# Supplementary material for: Geospatial Study of Psychiatric Mental Health-Advanced Practice Registered Nurses (PMH-APRNs) in the United States
Source: Atypon-hosted journal article supplement (doi:10.1176/appi.ps.000532011), 2011-12-01

# Clustering pattern of Certified Psychiatric Mental Health Nurses

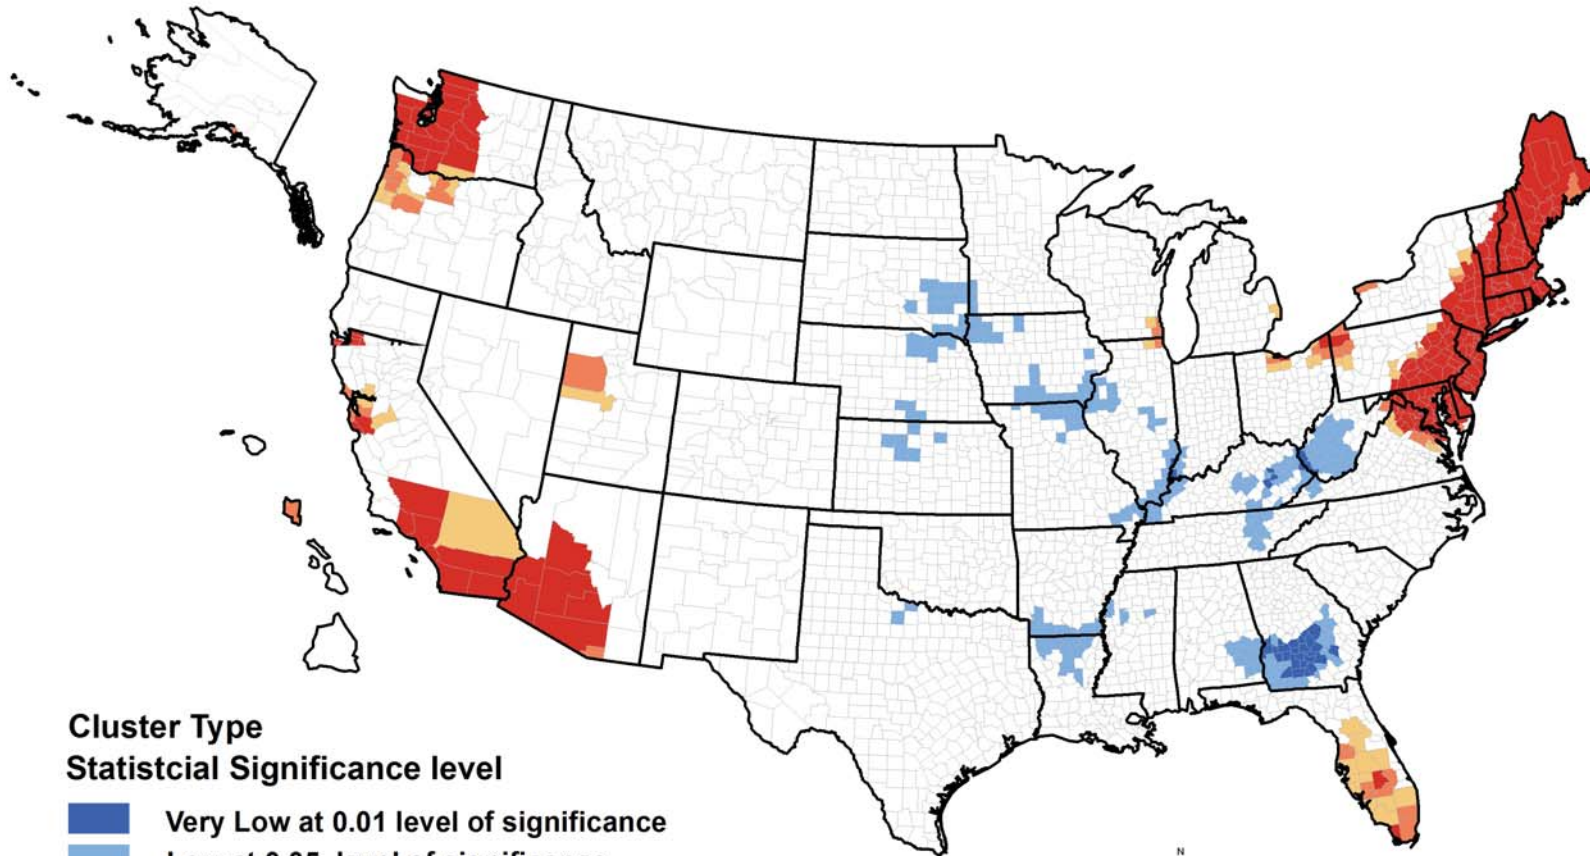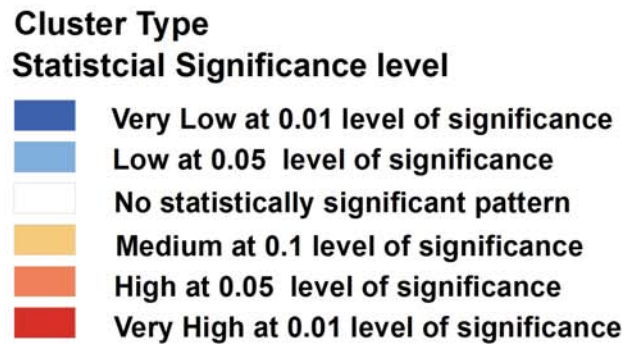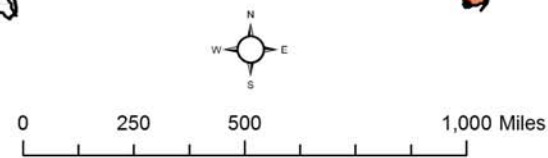

*Note: For visualization purposes Alaska and Hawaii are not on scale*

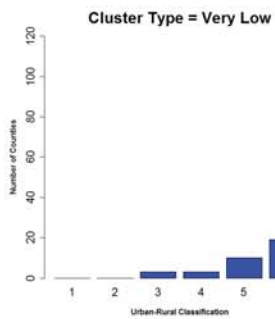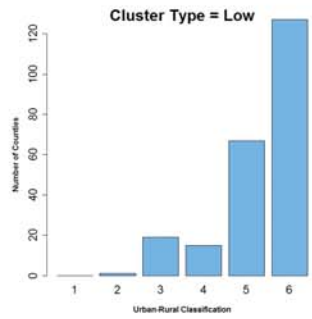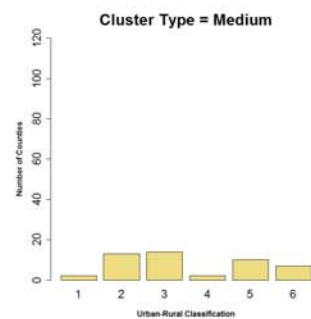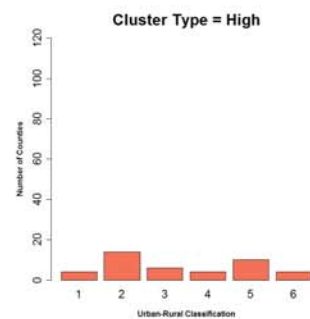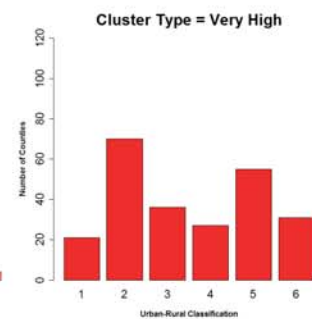

Supplement: pss6212_1506_DS.pdf [file pss6212_1506_DS.pdf]
